# Supplementary material for: Fragment-Based Ligand-Protein Contact Statistics: Application to Docking Simulations
Source: PubMed Central journal article supplement (PMC6567162; doi:10.3390/ijms20102499), 2019-05-21
Supplement: ijms-20-02499-s001.pdf [file ijms-20-02499-s001.pdf]

## Supplementary Materials

# Fragment-based ligand-protein contact statistics: application to docking simulations

Gabriele Macari <sup>1</sup>, Daniele Toti<sup>1</sup>, Carlo Del Moro<sup>1</sup> and Fabio Polticelli<sup>1,2</sup>

<sup>1</sup> Department of Sciences, Roma Tre University, 00146 Rome, Italy

<sup>2</sup> National Institute of Nuclear Physics, Roma Tre University, 00146 Rome, Italy

## Screening power

Table S1. Detailed summary of the results obtained in the Screening Power test using different datasets and scoring schemes

|            | top 1% | top 5% | top 10% |
|------------|--------|--------|---------|
| CS_5003    | 1.58   | 1.32   | 1.16    |
| CS_5003avg | 1.41   | 1.28   | 1.38    |
| CS_5005    | 1.58   | 1.44   | 1.25    |
| CS_5005avg | 1.92   | 1.15   | 1.58    |
| CS_5007    | 0.57   | 1.03   | 1.12    |
| CS_5007avg | 1.92   | 1.36   | 1.43    |
| CS_4003    | 1.15   | 1.32   | 1.17    |
| CS_4003avg | 1.92   | 1.42   | 1.58    |
| CS_4005    | 1.58   | 1.55   | 1.25    |
| CS_4005avg | 1.41   | 1.38   | 1.32    |
| CS_4007    | 0.57   | 1.15   | 1.12    |
| CS_4007avg | 1.92   | 1.22   | 1.38    |
| CS_50avg   | 4.61   | 2.98   | 2.24    |
| CS_40avg   | 2.56   | 1.9    | 1.33    |

## $\Delta$ RMSD comparisons

Table S2. Summary of the RMSD comparison. ADV row indicates the number of cases in which the RMSD of the top-ranking pose predicted by AutoDockVina (with respect to the co-crystallized ligand pose) is lower than the RMSD of the CS top ranking pose. For the CS row is the opposite. For Equal the poses predicted by the two approaches have the same RMSD.

|       | CS_4003 | CS_4005 | CS_4007 | CS_5003 | CS_5005 | CS_5007 |
|-------|---------|---------|---------|---------|---------|---------|
| ADV   | 44      | 42      | 46      | 45      | 45      | 45      |
| Equal | 19      | 18      | 18      | 19      | 18      | 18      |
| CS    | 22      | 27      | 23      | 22      | 24      | 24      |
